# Supplementary material for: Epigenetic Transgenerational Inheritance of Altered Sperm Histone Retention Sites
Source: PubMed Central journal article supplement (PMC5871750; doi:10.1038/s41598-018-23612-y), 2018-03-28
Supplement: 41598_2018_23612_MOESM1_ESM.pdf [file 41598_2018_23612_MOESM1_ESM.pdf]

# **Epigenetic Transgenerational Inheritance of Altered Sperm Histone Retention Sites**

Millissia Ben Maamar, Ingrid Sadler-Riggelman, Daniel Beck,  
Michael K. Skinner

**Supplementary Information**

## Supplemental Table Legends

**Table S1.** Core histone retention site list.

**Table S2.** DDT differential histone retention sites (DHRs) list.

**Table S3.** Vinclozolin differential histone retention sites (DHRs) list.

**Table S4.** H3K27me3 DDT differential histone retention sites (DHRs) list.

**Table S5.** Literature reported histone retention sites list.

Supplemental Table S1

## Core Histone Sites

| Site Name       | Chr # | Start     | # Windows | Length (bp) | Gene Annotation | Gene Category |
|-----------------|-------|-----------|-----------|-------------|-----------------|---------------|
| Site1:26599001  | 1     | 26599001  | 1         | 100         |                 |               |
| Site1:148641901 | 1     | 148641901 | 17        | 2700        |                 |               |
| Site1:180644501 | 1     | 180644501 | 17        | 2200        |                 |               |
| Site1:180692001 | 1     | 180692001 | 10        | 1200        |                 |               |
| Site1:180702101 | 1     | 180702101 | 37        | 4200        |                 |               |
| Site1:180718901 | 1     | 180718901 | 9         | 900         |                 |               |
| Site1:180800801 | 1     | 180800801 | 66        | 9700        |                 |               |
| Site1:180852201 | 1     | 180852201 | 7         | 700         |                 |               |
| Site1:180858101 | 1     | 180858101 | 10        | 1900        |                 |               |
| Site1:180861301 | 1     | 180861301 | 2         | 200         |                 |               |
| Site1:180882101 | 1     | 180882101 | 5         | 500         |                 |               |
| Site1:180893101 | 1     | 180893101 | 5         | 500         |                 |               |
| Site1:180896701 | 1     | 180896701 | 12        | 1800        |                 |               |
| Site1:180902601 | 1     | 180902601 | 4         | 400         |                 |               |
| Site1:180911501 | 1     | 180911501 | 20        | 3000        |                 |               |
| Site1:180948901 | 1     | 180948901 | 8         | 800         |                 |               |
| Site1:181185901 | 1     | 181185901 | 7         | 700         |                 |               |
| Site1:181188001 | 1     | 181188001 | 10        | 1900        |                 |               |
| Site1:181286501 | 1     | 181286501 | 6         | 600         |                 |               |
| Site2:197079101 | 2     | 197079101 | 16        | 2500        |                 |               |
| Site3:40701     | 3     | 40701     | 6         | 1400        |                 |               |
| Site3:133994001 | 3     | 133994001 | 31        | 5800        |                 |               |
| Site4:146545701 | 4     | 146545701 | 28        | 3100        |                 |               |
| Site7:22323401  | 7     | 22323401  | 4         | 400         |                 |               |
| Site7:22327201  | 7     | 22327201  | 9         | 1600        |                 |               |
| Site7:100303501 | 7     | 100303501 | 17        | 1900        |                 |               |
| Site10:78149601 | 10    | 78149601  | 1         | 100         | Stxbp4;Cox11    |               |
| Site12:1508601  | 12    | 1508601   | 35        | 4100        | 5S_rRNA         |               |
| Site12:3350301  | 12    | 3350301   | 66        | 7300        |                 |               |
| Site13:33474901 | 13    | 33474901  | 18        | 2200        |                 |               |
| Site13:33502401 | 13    | 33502401  | 31        | 3100        |                 |               |
| Site13:33508401 | 13    | 33508401  | 4         | 400         |                 |               |
| Site13:33591101 | 13    | 33591101  | 25        | 4000        |                 |               |
| Site13:33722901 | 13    | 33722901  | 12        | 1800        |                 |               |
| Site14:28440901 | 14    | 28440901  | 2         | 200         | Adgrl3          |               |
| Site17:44391001 | 17    | 44391001  | 5         | 500         |                 |               |
| Site17:44395901 | 17    | 44395901  | 21        | 4400        |                 |               |
| Site18:38412901 | 18    | 38412901  | 49        | 6200        |                 |               |
| Site19:56337701 | 19    | 56337701  | 16        | 1600        | Gas8;5S_rRNA    |               |
| Site20:40882001 | 20    | 40882001  | 18        | 3000        |                 |               |
| Site20:40913201 | 20    | 40913201  | 8         | 800         |                 |               |

**Supplemental Table S2**  
**DDT DHRs (p<10<sup>-7</sup>) List**

| DHR Name       | Chr # | Start     | Length (bp) | # SigWin | MinP-Value | CpG # | CpG Density | Associated Gene                   | Gene Category                  |
|----------------|-------|-----------|-------------|----------|------------|-------|-------------|-----------------------------------|--------------------------------|
| DHR1:21653101  | 1     | 21653101  | 800         | 1        | 3.40E-10   | 5     | 0.62        | Enpp3                             | Signaling                      |
| DHR1:52899001  | 1     | 52899001  | 4400        | 1        | 9.12E-08   | 57    | 1.29        | T;T2                              | Transcription                  |
| DHR1:63622201  | 1     | 63622201  | 2800        | 1        | 4.98E-08   | 13    | 0.46        |                                   |                                |
| DHR1:64723301  | 1     | 64723301  | 800         | 1        | 5.03E-08   | 3     | 0.37        |                                   |                                |
| DHR1:74435301  | 1     | 74435301  | 900         | 1        | 9.18E-08   | 7     | 0.77        |                                   |                                |
| DHR1:94639901  | 1     | 94639901  | 3200        | 1        | 1.38E-09   | 22    | 0.68        |                                   |                                |
| DHR1:96031701  | 1     | 96031701  | 100         | 1        | 7.87E-09   | 0     | 0           |                                   |                                |
| DHR1:110940801 | 1     | 110940801 | 2400        | 1        | 1.54E-08   | 7     | 0.29        |                                   |                                |
| DHR1:121353901 | 1     | 121353901 | 1200        | 1        | 6.30E-08   | 5     | 0.41        |                                   |                                |
| DHR1:158604501 | 1     | 158604501 | 500         | 1        | 1.55E-08   | 2     | 0.4         |                                   |                                |
| DHR1:191840601 | 1     | 191840601 | 2100        | 1        | 5.36E-09   | 17    | 0.8         | Scnn1b                            | Transport                      |
| DHR1:274030901 | 1     | 274030901 | 16300       | 1        | 2.15E-08   | 482   | 2.95        | Mxi1                              | Transcription                  |
| DHR2:7709401   | 2     | 7709401   | 100         | 1        | 6.14E-08   | 0     | 0           |                                   |                                |
| DHR2:15915901  | 2     | 15915901  | 200         | 1        | 3.26E-08   | 0     | 0           |                                   |                                |
| DHR2:17166201  | 2     | 17166201  | 1700        | 1        | 2.04E-08   | 7     | 0.41        |                                   |                                |
| DHR2:19538201  | 2     | 19538201  | 100         | 1        | 6.33E-08   | 2     | 2           |                                   |                                |
| DHR2:45199501  | 2     | 45199501  | 600         | 1        | 8.21E-08   | 1     | 0.16        | RGD1561161                        | Extracellular Matrix           |
| DHR2:55287301  | 2     | 55287301  | 1200        | 1        | 4.44E-08   | 7     | 0.58        |                                   |                                |
| DHR2:62447001  | 2     | 62447001  | 3800        | 1        | 2.70E-09   | 56    | 1.47        | Pdzd2                             | Unknown                        |
| DHR2:71933501  | 2     | 71933501  | 100         | 1        | 9.09E-09   | 0     | 0           |                                   |                                |
| DHR2:114565501 | 2     | 114565501 | 100         | 1        | 2.27E-10   | 2     | 2           |                                   |                                |
| DHR2:120117001 | 2     | 120117001 | 800         | 1        | 4.10E-08   | 6     | 0.75        |                                   |                                |
| DHR2:132344601 | 2     | 132344601 | 1400        | 1        | 9.09E-08   | 5     | 0.35        | AABR07010330.1;<br>AABR07010330.2 | NA                             |
| DHR2:143971901 | 2     | 143971901 | 3800        | 1        | 9.74E-08   | 30    | 0.78        | LOC103691556                      | Development                    |
| DHR2:190629101 | 2     | 190629101 | 300         | 1        | 2.35E-08   | 1     | 0.33        | S100vp                            | Signaling                      |
| DHR2:195349901 | 2     | 195349901 | 300         | 1        | 4.24E-08   | 1     | 0.33        |                                   |                                |
| DHR2:211991601 | 2     | 211991601 | 300         | 1        | 6.16E-08   | 1     | 0.33        |                                   |                                |
| DHR2:260751601 | 2     | 260751601 | 4400        | 1        | 1.81E-08   | 28    | 0.63        |                                   |                                |
| DHR3:52348601  | 3     | 52348601  | 2400        | 1        | 3.39E-08   | 29    | 1.2         | Ttc21b                            | Unknown                        |
| DHR3:70634901  | 3     | 70634901  | 3000        | 1        | 3.93E-08   | 21    | 0.7         |                                   |                                |
| DHR3:100281801 | 3     | 100281801 | 800         | 1        | 1.97E-08   | 5     | 0.62        | Mettl15                           | Unknown                        |
| DHR3:119851001 | 3     | 119851001 | 1500        | 1        | 3.13E-09   | 19    | 1.26        |                                   |                                |
| DHR3:156431901 | 3     | 156431901 | 4900        | 1        | 9.16E-09   | 72    | 1.46        | AABR07054488.1                    | NA                             |
| DHR3:160151701 | 3     | 160151701 | 1500        | 1        | 4.99E-08   | 7     | 0.46        |                                   |                                |
| DHR3:161334101 | 3     | 161334101 | 1700        | 2        | 4.68E-08   | 22    | 1.29        | Pcif1                             | Transcription                  |
| DHR3:168069401 | 3     | 168069401 | 9900        | 1        | 5.81E-08   | 207   | 2.09        |                                   |                                |
| DHR4:6117001   | 4     | 6117001   | 1300        | 1        | 6.32E-09   | 6     | 0.46        | Kmt2c                             | Transcription                  |
| DHR4:28460901  | 4     | 28460901  | 800         | 1        | 6.03E-08   | 5     | 0.62        | Vps50                             | Unknown                        |
| DHR4:29141001  | 4     | 29141001  | 3100        | 1        | 8.46E-08   | 23    | 0.74        |                                   |                                |
| DHR4:39269301  | 4     | 39269301  | 3600        | 1        | 2.40E-08   | 21    | 0.58        |                                   |                                |
| DHR4:82386701  | 4     | 82386701  | 4800        | 1        | 5.33E-09   | 47    | 0.97        | AABR07060588.2                    | NA                             |
| DHR4:93787601  | 4     | 93787601  | 1700        | 1        | 9.03E-08   | 3     | 0.17        | AABR07060788.1                    | NA                             |
| DHR4:179456401 | 4     | 179456401 | 4200        | 1        | 8.73E-08   | 78    | 1.85        | Casc1                             | Unknown                        |
| DHR5:7557901   | 5     | 7557901   | 1000        | 1        | 3.60E-08   | 2     | 0.2         |                                   |                                |
| DHR5:34733901  | 5     | 34733901  | 400         | 1        | 2.28E-08   | 3     | 0.75        | Nkain3                            | Transport                      |
| DHR5:42362001  | 5     | 42362001  | 1500        | 1        | 6.51E-08   | 6     | 0.4         |                                   |                                |
| DHR5:61265801  | 5     | 61265801  | 2600        | 1        | 9.95E-08   | 26    | 1           |                                   |                                |
| DHR5:74139401  | 5     | 74139401  | 1400        | 1        | 3.36E-08   | 15    | 1.07        | Epb41l4b                          |                                |
| DHR5:126404301 | 5     | 126404301 | 800         | 1        | 7.70E-08   | 4     | 0.5         | Acot11                            | Metabolism                     |
| DHR5:133465301 | 5     | 133465301 | 600         | 1        | 1.54E-09   | 6     | 1           |                                   |                                |
| DHR5:151666101 | 5     | 151666101 | 10600       | 1        | 6.92E-08   | 140   | 1.32        | AC118963.2                        | NA                             |
| DHR5:153222501 | 5     | 153222501 | 2000        | 1        | 3.27E-08   | 32    | 1.6         | Rhd;Tmem50a                       | Transport                      |
| DHR5:171384801 | 5     | 171384801 | 19700       | 1        | 1.18E-09   | 383   | 1.94        | Tp73                              | Transcription                  |
| DHR6:490501    | 6     | 490501    | 300         | 1        | 9.39E-08   | 1     | 0.33        |                                   |                                |
| DHR6:21564501  | 6     | 21564501  | 200         | 1        | 3.90E-08   | 2     | 1           | Ltbp1                             | Signaling;Extracellular Matrix |

|                 |    |           |      |   |          |     |      |                                                  |                      |
|-----------------|----|-----------|------|---|----------|-----|------|--------------------------------------------------|----------------------|
| DHR6:23770901   | 6  | 23770901  | 500  | 1 | 8.47E-08 | 7   | 1.4  |                                                  |                      |
| DHR6:65733801   | 6  | 65733801  | 8300 | 1 | 8.79E-08 | 29  | 0.34 |                                                  |                      |
| DHR6:72318401   | 6  | 72318401  | 1600 | 1 | 4.59E-08 | 17  | 1.06 |                                                  |                      |
| DHR6:78101601   | 6  | 78101601  | 1300 | 1 | 2.53E-08 | 9   | 0.69 |                                                  |                      |
| DHR6:94845101   | 6  | 94845101  | 4000 | 1 | 6.67E-08 | 70  | 1.75 | Jkamp;Ccadc175                                   | Receptor             |
| DHR7:31228101   | 7  | 31228101  | 300  | 1 | 5.96E-08 | 1   | 0.33 | Anks1b                                           | Receptor             |
| DHR7:36759401   | 7  | 36759401  | 1700 | 2 | 1.15E-08 | 31  | 1.82 |                                                  |                      |
| DHR7:52267801   | 7  | 52267801  | 1200 | 1 | 6.30E-08 | 5   | 0.41 | Nav3                                             | Development          |
| DHR7:101472001  | 7  | 101472001 | 300  | 1 | 3.42E-09 | 1   | 0.33 |                                                  |                      |
| DHR7:108278101  | 7  | 108278101 | 8500 | 1 | 9.01E-08 | 46  | 0.54 |                                                  |                      |
| DHR8:1311701    | 8  | 1311701   | 2700 | 1 | 6.65E-08 | 21  | 0.77 |                                                  |                      |
| DHR8:8987901    | 8  | 8987901   | 5600 | 1 | 2.98E-08 | 40  | 0.71 |                                                  |                      |
| DHR8:11868301   | 8  | 11868301  | 1700 | 1 | 3.11E-08 | 9   | 0.52 |                                                  |                      |
| DHR8:15757901   | 8  | 15757901  | 1100 | 1 | 5.86E-08 | 5   | 0.45 |                                                  |                      |
| DHR8:22587901   | 8  | 22587901  | 3400 | 1 | 6.07E-08 | 36  | 1.05 | Carm1                                            | Epigenetic           |
| DHR8:56663101   | 8  | 56663101  | 1300 | 1 | 1.76E-08 | 15  | 1.15 | Zc3h12c                                          | Transcription        |
| DHR8:104686501  | 8  | 104686501 | 4300 | 1 | 6.91E-08 | 61  | 1.41 |                                                  |                      |
| DHR9:2504001    | 9  | 2504001   | 800  | 1 | 5.52E-09 | 14  | 1.75 |                                                  |                      |
| DHR9:15615301   | 9  | 15615301  | 3700 | 1 | 6.92E-08 | 77  | 2.08 | U6;Guca1a;Guca1b                                 | Signaling            |
| DHR9:44359301   | 9  | 44359301  | 100  | 1 | 2.97E-08 | 0   | 0    | Tsga10                                           | Signaling            |
| DHR10:17789001  | 10 | 17789001  | 1700 | 2 | 2.73E-08 | 18  | 1.05 |                                                  |                      |
| DHR10:19431101  | 10 | 19431101  | 400  | 1 | 4.07E-08 | 13  | 3.25 |                                                  |                      |
| DHR10:30719201  | 10 | 30719201  | 200  | 1 | 3.28E-08 | 1   | 0.5  |                                                  |                      |
| DHR10:33962601  | 10 | 33962601  | 300  | 1 | 7.20E-08 | 2   | 0.66 |                                                  |                      |
| DHR10:74232901  | 10 | 74232901  | 2900 | 2 | 3.13E-08 | 38  | 1.31 | Ypel2                                            | Unknown              |
| DHR10:80208101  | 10 | 80208101  | 2100 | 1 | 9.90E-08 | 5   | 0.23 |                                                  |                      |
| DHR10:86369901  | 10 | 86369901  | 3900 | 1 | 3.29E-08 | 63  | 1.61 | Erb2;U6                                          | Receptor             |
| DHR10:88076101  | 10 | 88076101  | 2100 | 1 | 3.94E-09 | 23  | 1.09 | Krt14;Rn50_10_0879.7;LOC108352134;Rn50_10_0879.5 | Cytoskeleton         |
| DHR10:112214601 | 10 | 112214601 | 1300 | 1 | 4.19E-08 | 23  | 1.76 |                                                  |                      |
| DHR11:713401    | 11 | 713401    | 2000 | 1 | 7.57E-08 | 16  | 0.8  | Epha3                                            | Receptor             |
| DHR11:2657201   | 11 | 2657201   | 300  | 1 | 6.93E-08 | 4   | 1.33 | Pou1f1                                           | Transcription        |
| DHR11:16751201  | 11 | 16751201  | 1500 | 1 | 1.36E-08 | 8   | 0.53 |                                                  |                      |
| DHR11:24413001  | 11 | 24413001  | 2500 | 1 | 9.23E-08 | 31  | 1.24 | App                                              | Signaling            |
| DHR11:75080801  | 11 | 75080801  | 3400 | 1 | 4.41E-08 | 58  | 1.7  | Atp13a5                                          | Transport            |
| DHR11:81865301  | 11 | 81865301  | 500  | 1 | 9.81E-09 | 1   | 0.2  |                                                  |                      |
| DHR12:3207201   | 12 | 3207201   | 100  | 1 | 6.21E-08 | 1   | 1    | AABR07035008.3; AABR07035008.1; AABR07035008.2   | NA                   |
| DHR12:12345301  | 12 | 12345301  | 1700 | 1 | 3.95E-08 | 24  | 1.41 |                                                  |                      |
| DHR12:30870401  | 12 | 30870401  | 5100 | 2 | 6.60E-11 | 59  | 1.15 |                                                  |                      |
| DHR12:31592301  | 12 | 31592301  | 2700 | 1 | 4.80E-09 | 48  | 1.77 | Rimbp2                                           | Binding Protein      |
| DHR12:41347101  | 12 | 41347101  | 9400 | 1 | 2.01E-08 | 132 | 1.4  | Oas2                                             | Transcription        |
| DHR12:44655701  | 12 | 44655701  | 5100 | 2 | 3.43E-08 | 68  | 1.33 | Ksr2                                             | Signaling            |
| DHR12:49132601  | 12 | 49132601  | 800  | 1 | 1.77E-08 | 2   | 0.25 |                                                  |                      |
| DHR12:49999601  | 12 | 49999601  | 1200 | 1 | 6.00E-09 | 7   | 0.58 |                                                  |                      |
| DHR13:35160901  | 13 | 35160901  | 7100 | 1 | 5.50E-08 | 85  | 1.19 |                                                  |                      |
| DHR13:98634901  | 13 | 98634901  | 5800 | 1 | 6.00E-08 | 101 | 1.74 | Itpkb                                            | Signaling            |
| DHR13:105938801 | 13 | 105938801 | 700  | 1 | 1.63E-08 | 7   | 1    |                                                  |                      |
| DHR13:107153901 | 13 | 107153901 | 800  | 1 | 6.92E-09 | 6   | 0.75 | Ush2a                                            | Extracellular Matrix |
| DHR13:108923601 | 13 | 108923601 | 3900 | 1 | 6.90E-08 | 75  | 1.92 |                                                  |                      |
| DHR14:12569201  | 14 | 12569201  | 400  | 1 | 4.47E-09 | 2   | 0.5  |                                                  |                      |
| DHR14:27374201  | 14 | 27374201  | 1300 | 1 | 9.37E-08 | 12  | 0.92 |                                                  |                      |
| DHR14:45699901  | 14 | 45699901  | 1900 | 1 | 8.42E-10 | 65  | 3.42 | Tbc1d1                                           | Signaling            |
| DHR14:48414001  | 14 | 48414001  | 4300 | 1 | 5.82E-08 | 20  | 0.46 |                                                  |                      |
| DHR14:66240201  | 14 | 66240201  | 3000 | 1 | 8.46E-08 | 15  | 0.5  |                                                  |                      |
| DHR14:73199901  | 14 | 73199901  | 1800 | 1 | 4.98E-08 | 11  | 0.61 |                                                  |                      |

|                 |    |           |      |   |          |     |       |                |               |
|-----------------|----|-----------|------|---|----------|-----|-------|----------------|---------------|
| DHR14:83665301  | 14 | 83665301  | 1000 | 1 | 3.89E-10 | 5   | 0.5   | Rnf185         | Transcription |
| DHR14:110472901 | 14 | 110472901 | 400  | 1 | 9.05E-08 | 2   | 0.5   |                |               |
| DHR15:16826901  | 15 | 16826901  | 1100 | 1 | 2.68E-08 | 10  | 0.9   |                |               |
| DHR15:23225501  | 15 | 23225501  | 3900 | 1 | 4.18E-08 | 17  | 0.43  |                |               |
| DHR15:29085801  | 15 | 29085801  | 900  | 1 | 6.26E-09 | 3   | 0.33  | AABR07017599.1 | NA            |
| DHR15:66487401  | 15 | 66487401  | 100  | 1 | 1.38E-08 | 0   | 0     | SNORA17        | NA            |
| DHR15:71154301  | 15 | 71154301  | 500  | 1 | 8.16E-08 | 2   | 0.4   |                |               |
| DHR15:74103601  | 15 | 74103601  | 900  | 1 | 1.16E-08 | 4   | 0.44  |                |               |
| DHR15:97162101  | 15 | 97162101  | 2000 | 1 | 5.00E-08 | 5   | 0.25  |                |               |
| DHR16:1520801   | 16 | 1520801   | 2000 | 1 | 2.94E-09 | 30  | 1.5   |                |               |
| DHR16:2434801   | 16 | 2434801   | 200  | 1 | 4.16E-08 | 1   | 0.5   | Dnah12         | Cytoskeleton  |
| DHR16:12322101  | 16 | 12322101  | 100  | 1 | 6.44E-09 | 1   | 1     |                |               |
| DHR16:54006501  | 16 | 54006501  | 1900 | 1 | 1.63E-08 | 27  | 1.42  | Asah1          |               |
| DHR16:68733201  | 16 | 68733201  | 5900 | 1 | 8.91E-08 | 70  | 1.18  |                |               |
| DHR16:77797201  | 16 | 77797201  | 1700 | 1 | 6.01E-08 | 13  | 0.76  |                |               |
| DHR16:80659701  | 16 | 80659701  | 6400 | 1 | 1.70E-09 | 208 | 3.25  | Erich1         | Unknown       |
| DHR16:81037201  | 16 | 81037201  | 1100 | 1 | 6.28E-08 | 3   | 0.27  | Tmco3          | Transport     |
| DHR16:85488501  | 16 | 85488501  | 1500 | 1 | 5.85E-08 | 8   | 0.53  |                |               |
| DHR17:24965901  | 17 | 24965901  | 1900 | 1 | 5.45E-08 | 25  | 1.31  |                |               |
| DHR17:30107501  | 17 | 30107501  | 1000 | 1 | 9.41E-08 | 13  | 1.3   |                |               |
| DHR17:61918901  | 17 | 61918901  | 1200 | 1 | 2.56E-08 | 6   | 0.5   |                |               |
| DHR17:88432001  | 17 | 88432001  | 900  | 1 | 1.79E-08 | 15  | 1.66  | Gpr158         | Receptor      |
| DHR18:25095501  | 18 | 25095501  | 1700 | 1 | 7.26E-08 | 20  | 1.17  |                |               |
| DHR18:44107301  | 18 | 44107301  | 1500 | 1 | 8.99E-09 | 4   | 0.26  | LOC103694210   | NA            |
| DHR18:46655901  | 18 | 46655901  | 1500 | 1 | 2.55E-09 | 10  | 0.66  |                |               |
| DHR18:47777701  | 18 | 47777701  | 1700 | 1 | 9.71E-08 | 19  | 1.11  | Sncaip         | Development   |
| DHR19:3174201   | 19 | 3174201   | 2800 | 1 | 5.36E-08 | 17  | 0.6   |                |               |
| DHR19:52418801  | 19 | 52418801  | 1900 | 1 | 7.40E-08 | 32  | 1.68  | Tlhc1          | Unknown       |
| DHR19:52551601  | 19 | 52551601  | 3300 | 1 | 6.30E-08 | 41  | 1.24  |                |               |
| DHR19:60051001  | 19 | 60051001  | 700  | 1 | 9.12E-08 | 8   | 1.142 | Pard3          | Cell Junction |
| DHR20:13453401  | 20 | 13453401  | 1000 | 1 | 8.89E-08 | 16  | 1.6   | Slc5a4         | Transport     |
| DHR20:45575901  | 20 | 45575901  | 500  | 1 | 9.12E-08 | 6   | 1.2   | Cdk19          | Cell Cycle    |
| DHR20:48972401  | 20 | 48972401  | 2200 | 1 | 2.62E-08 | 69  | 3.13  | Aim1           | Development   |

**Supplemental Table S3**  
**Vinclozolin DHRs (p<10<sup>-6</sup>) List**

| DHR Name       | Chr # | Start     | Length (bp) | # SigWin | MinP-Value | CpG # | CpG Density | Associated Gene                   | Gene Category        |
|----------------|-------|-----------|-------------|----------|------------|-------|-------------|-----------------------------------|----------------------|
| DHR1:20114501  | 1     | 20114501  | 300         | 1        | 1.61E-07   | 14    | 4.66        | LOC100360791                      |                      |
| DHR1:26098101  | 1     | 26098101  | 1900        | 1        | 6.47E-08   | 12    | 0.63        |                                   |                      |
| DHR1:38831601  | 1     | 38831601  | 2400        | 1        | 6.46E-07   | 21    | 0.87        | AABR07001207.1;<br>AABR07001210.1 | NA                   |
| DHR1:56022601  | 1     | 56022601  | 16600       | 1        | 1.81E-10   | 128   | 0.77        |                                   |                      |
| DHR1:91780301  | 1     | 91780301  | 200         | 1        | 3.50E-07   | 1     | 0.5         | Tdrd12                            | Transcription        |
| DHR1:130661501 | 1     | 130661501 | 600         | 1        | 1.76E-07   | 4     | 0.66        | AABR07004221.2;<br>AABR07004221.1 | NA                   |
| DHR1:148050901 | 1     | 148050901 | 1900        | 1        | 6.98E-07   | 6     | 0.31        | LOC100361547                      | NA                   |
| DHR1:148469701 | 1     | 148469701 | 800         | 1        | 6.79E-07   | 11    | 1.37        |                                   |                      |
| DHR1:162732901 | 1     | 162732901 | 200         | 1        | 7.13E-07   | 0     | 0           | AC133383.1                        | NA                   |
| DHR1:172681501 | 1     | 172681501 | 1100        | 1        | 1.55E-07   | 15    | 1.36        |                                   |                      |
| DHR1:179450901 | 1     | 179450901 | 8200        | 1        | 9.62E-08   | 75    | 0.91        |                                   |                      |
| DHR1:182254101 | 1     | 182254101 | 2000        | 1        | 3.86E-07   | 22    | 1.1         |                                   |                      |
| DHR1:197921801 | 1     | 197921801 | 1500        | 1        | 9.78E-07   | 15    | 1           | Atxn2l                            | Development;Unknown  |
| DHR1:258374601 | 1     | 258374601 | 1100        | 1        | 6.45E-08   | 4     | 0.36        |                                   |                      |
| DHR1:267314801 | 1     | 267314801 | 1200        | 1        | 4.14E-07   | 58    | 4.83        | Stn1                              | Signaling            |
| DHR2:7491201   | 2     | 7491201   | 1200        | 1        | 1.46E-07   | 7     | 0.58        |                                   |                      |
| DHR2:8302401   | 2     | 8302401   | 2600        | 1        | 4.55E-07   | 33    | 1.26        |                                   |                      |
| DHR2:46298001  | 2     | 46298001  | 1400        | 1        | 3.01E-07   | 9     | 0.64        |                                   |                      |
| DHR2:158865101 | 2     | 158865101 | 8400        | 1        | 5.76E-07   | 65    | 0.77        |                                   |                      |
| DHR2:159989201 | 2     | 159989201 | 3900        | 1        | 1.88E-07   | 38    | 0.97        |                                   |                      |
| DHR2:160707201 | 2     | 160707201 | 1900        | 1        | 8.34E-10   | 6     | 0.31        |                                   |                      |
| DHR2:161417501 | 2     | 161417501 | 2800        | 1        | 4.30E-07   | 18    | 0.64        |                                   |                      |
| DHR2:206393801 | 2     | 206393801 | 1900        | 1        | 5.79E-07   | 16    | 0.84        | Ptpn22                            | Signaling            |
| DHR3:40557601  | 3     | 40557601  | 600         | 1        | 1.85E-07   | 1     | 0.16        | Galnt13                           | Unknown              |
| DHR3:64849201  | 3     | 64849201  | 4800        | 2        | 4.63E-07   | 45    | 0.93        | AABR07052589.1                    | NA                   |
| DHR3:96269401  | 3     | 96269401  | 1100        | 1        | 3.21E-08   | 5     | 0.45        |                                   |                      |
| DHR3:96406901  | 3     | 96406901  | 1100        | 1        | 7.67E-07   | 3     | 0.27        |                                   |                      |
| DHR3:99311301  | 3     | 99311301  | 4300        | 1        | 4.01E-07   | 41    | 0.95        |                                   |                      |
| DHR3:106526601 | 3     | 106526601 | 400         | 1        | 9.96E-07   | 2     | 0.5         |                                   |                      |
| DHR3:134798701 | 3     | 134798701 | 2700        | 1        | 6.49E-07   | 9     | 0.33        |                                   |                      |
| DHR3:169128301 | 3     | 169128301 | 3900        | 1        | 9.29E-07   | 25    | 0.64        |                                   |                      |
| DHR4:43876701  | 4     | 43876701  | 5400        | 1        | 3.87E-07   | 37    | 0.68        |                                   |                      |
| DHR4:70613001  | 4     | 70613001  | 800         | 1        | 7.28E-07   | 2     | 0.25        | AC142181.1;Prss3                  | NA;Proteolysis       |
| DHR4:72255501  | 4     | 72255501  | 400         | 1        | 9.28E-07   | 13    | 3.25        |                                   |                      |
| DHR4:84869401  | 4     | 84869401  | 200         | 1        | 1.93E-07   | 2     | 1           | Mturn                             |                      |
| DHR4:131323001 | 4     | 131323001 | 100         | 1        | 8.91E-08   | 1     | 1           |                                   |                      |
| DHR4:143416201 | 4     | 143416201 | 800         | 1        | 7.12E-07   | 3     | 0.37        | U6                                | Translation          |
| DHR5:4747501   | 5     | 4747501   | 300         | 1        | 5.10E-07   | 1     | 0.33        | Rbpj                              | Transcription        |
| DHR5:111459001 | 5     | 111459001 | 500         | 1        | 5.86E-07   | 7     | 1.4         |                                   |                      |
| DHR6:32404601  | 6     | 32404601  | 400         | 1        | 1.89E-09   | 10    | 2.5         | AABR07063508.1                    | NA                   |
| DHR6:40324101  | 6     | 40324101  | 800         | 1        | 6.14E-07   | 2     | 0.25        |                                   |                      |
| DHR6:50579901  | 6     | 50579901  | 600         | 1        | 8.22E-08   | 8     | 1.33        | Lamb1                             | Extracellular Matrix |
| DHR6:70047001  | 6     | 70047001  | 1300        | 1        | 4.55E-07   | 7     | 0.53        |                                   |                      |
| DHR6:139316601 | 6     | 139316601 | 400         | 1        | 1.89E-07   | 0     | 0           |                                   |                      |
| DHR7:9633901   | 7     | 9633901   | 1100        | 1        | 1.36E-08   | 3     | 0.27        | Olr1072                           | Receptor             |
| DHR7:13470601  | 7     | 13470601  | 2000        | 1        | 6.53E-07   | 19    | 0.95        | Olr1077                           | Receptor             |
| DHR7:21201301  | 7     | 21201301  | 800         | 1        | 7.83E-07   | 3     | 0.37        | AABR07056200.1                    | NA                   |
| DHR7:21932501  | 7     | 21932501  | 9200        | 1        | 2.17E-07   | 41    | 0.44        |                                   |                      |
| DHR7:27041001  | 7     | 27041001  | 300         | 1        | 6.50E-07   | 6     | 2           |                                   |                      |
| DHR7:73133501  | 7     | 73133501  | 700         | 1        | 1.81E-07   | 1     | 0.14        | Matn2                             | Extracellular Matrix |
| DHR7:139312601 | 7     | 139312601 | 1000        | 1        | 3.03E-07   | 29    | 2.9         | Hdac7                             | Epigenetic           |
| DHR7:142476401 | 7     | 142476401 | 1300        | 1        | 6.08E-07   | 24    | 1.84        |                                   |                      |
| DHR8:10561601  | 8     | 10561601  | 500         | 1        | 5.26E-07   | 2     | 0.4         |                                   |                      |
| DHR8:64174701  | 8     | 64174701  | 300         | 1        | 3.23E-07   | 0     | 0           | Arih1                             | Protease             |

|                 |    |           |       |   |          |     |      |                               |               |
|-----------------|----|-----------|-------|---|----------|-----|------|-------------------------------|---------------|
| DHR8:106250001  | 8  | 106250001 | 500   | 1 | 4.23E-07 | 6   | 1.2  |                               |               |
| DHR9:11690901   | 9  | 11690901  | 200   | 1 | 6.17E-07 | 5   | 2.5  |                               |               |
| DHR9:45398701   | 9  | 45398701  | 200   | 1 | 3.58E-08 | 0   | 0    |                               |               |
| DHR9:89873301   | 9  | 89873301  | 1700  | 1 | 8.11E-07 | 12  | 0.7  |                               |               |
| DHR9:111560601  | 9  | 111560601 | 1500  | 1 | 9.78E-07 | 20  | 1.33 |                               |               |
| DHR10:52882501  | 10 | 52882501  | 1400  | 1 | 5.85E-08 | 14  | 1    | Shisa6                        | Development   |
| DHR11:3960701   | 11 | 3960701   | 1700  | 1 | 9.78E-07 | 11  | 0.64 |                               |               |
| DHR11:23267901  | 11 | 23267901  | 300   | 1 | 7.17E-07 | 3   | 1    | U4                            | Translation   |
| DHR12:34170901  | 12 | 34170901  | 2400  | 1 | 8.11E-07 | 20  | 0.83 |                               |               |
| DHR13:18134301  | 13 | 18134301  | 1800  | 1 | 1.14E-07 | 5   | 0.27 |                               |               |
| DHR13:37396601  | 13 | 37396601  | 100   | 1 | 9.78E-07 | 0   | 0    | Ccdc93                        | Unknown       |
| DHR13:53512701  | 13 | 53512701  | 400   | 1 | 2.04E-07 | 8   | 2    | Zfp281                        | Transcription |
| DHR13:69789901  | 13 | 69789901  | 700   | 1 | 7.97E-07 | 4   | 0.57 | Tsen15                        | Translation   |
| DHR13:82823801  | 13 | 82823801  | 1700  | 1 | 6.11E-07 | 25  | 1.47 |                               |               |
| DHR13:88115001  | 13 | 88115001  | 2100  | 1 | 2.54E-07 | 20  | 0.95 | AABR07021730.1                | NA            |
| DHR13:89436001  | 13 | 89436001  | 11900 | 1 | 1.03E-07 | 475 | 3.99 | Fcgr2b                        | Immune        |
| DHR13:91203701  | 13 | 91203701  | 400   | 1 | 4.21E-08 | 26  | 6.5  | LOC100911825;<br>LOC108348047 | Receptor      |
| DHR14:21520801  | 14 | 21520801  | 100   | 1 | 8.24E-09 | 0   | 0    | Smr3b                         | Development   |
| DHR14:77890801  | 14 | 77890801  | 3300  | 1 | 6.48E-08 | 48  | 1.45 | Stk32b                        | Signaling     |
| DHR14:80322501  | 14 | 80322501  | 5000  | 1 | 2.85E-07 | 68  | 1.36 | Acox3                         | Metabolism    |
| DHR14:100736101 | 14 | 100736101 | 1100  | 1 | 9.14E-07 | 25  | 2.27 |                               |               |
| DHR15:18327301  | 15 | 18327301  | 1600  | 1 | 6.61E-07 | 13  | 0.81 | Fam3d                         | Unknown       |
| DHR15:21107801  | 15 | 21107801  | 1100  | 1 | 3.65E-08 | 9   | 0.81 | Rn50_15_0251.1                | NA            |
| DHR15:62619901  | 15 | 62619901  | 2100  | 1 | 8.92E-07 | 29  | 1.38 |                               |               |
| DHR15:66768001  | 15 | 66768001  | 2000  | 1 | 6.15E-07 | 14  | 0.7  |                               |               |
| DHR16:7904201   | 16 | 7904201   | 1100  | 1 | 1.93E-07 | 7   | 0.63 | Ankrd28                       | Unknown       |
| DHR16:11145501  | 16 | 11145501  | 1000  | 1 | 2.03E-08 | 23  | 2.3  |                               |               |
| DHR16:62074501  | 16 | 62074501  | 300   | 1 | 8.59E-07 | 10  | 3.33 | Rbpms                         | Transcription |
| DHR17:46967501  | 17 | 46967501  | 200   | 1 | 8.07E-07 | 2   | 1    |                               |               |
| DHR17:53391501  | 17 | 53391501  | 2200  | 1 | 6.01E-07 | 6   | 0.27 | Hecw1                         | Protease      |
| DHR17:89407701  | 17 | 89407701  | 12000 | 1 | 7.28E-07 | 112 | 0.93 |                               |               |
| DHR18:9297101   | 18 | 9297101   | 500   | 1 | 1.07E-07 | 5   | 1    |                               |               |
| DHR18:23356401  | 18 | 23356401  | 100   | 1 | 4.07E-08 | 0   | 0    |                               |               |
| DHR18:30445201  | 18 | 30445201  | 3300  | 1 | 7.35E-07 | 23  | 0.69 | Pcdhb8                        | Cytoskeleton  |
| DHR18:40199401  | 18 | 40199401  | 300   | 1 | 4.40E-07 | 3   | 1    | Pggt1b                        | Transport     |
| DHR18:61681401  | 18 | 61681401  | 200   | 1 | 8.57E-07 | 2   | 1    | Cplx4                         | Golgi         |
| DHR19:28125101  | 19 | 28125101  | 10900 | 1 | 2.51E-07 | 92  | 0.84 | AABR07043407.1                | NA            |
| DHR19:59823501  | 19 | 59823501  | 200   | 1 | 3.53E-07 | 2   | 1    |                               |               |
| DHR20:26763401  | 20 | 26763401  | 200   | 1 | 8.11E-07 | 3   | 1.5  | Herc4                         | Protease      |
| DHR20:27460201  | 20 | 27460201  | 4500  | 1 | 1.34E-07 | 172 | 3.82 |                               |               |
| DHR20:27471801  | 20 | 27471801  | 3300  | 2 | 9.67E-09 | 143 | 4.33 |                               |               |
| DHR20:36595601  | 20 | 36595601  | 400   | 1 | 5.63E-07 | 2   | 0.5  |                               |               |
| DHR20:54854301  | 20 | 54854301  | 300   | 1 | 3.96E-07 | 5   | 1.66 |                               |               |
| DHRX:103932101  | X  | 103932101 | 200   | 1 | 9.13E-07 | 2   | 1    |                               |               |
| DHRX:150631501  | X  | 150631501 | 300   | 1 | 5.19E-07 | 1   | 0.33 |                               |               |



**Supplemental Table S4**  
**DDT H3K27me3 DHRs List**

| DHR Name       | Chr # | Start     | Length (bp) | # SigWin | MinP-Value | CpG # | CpG Density | Associated Gene | Gene Category   |
|----------------|-------|-----------|-------------|----------|------------|-------|-------------|-----------------|-----------------|
| DHR2:6073501   | 2     | 6073501   | 600         | 1        | 7.34E-07   | 3     | 0.5         |                 |                 |
| DHR2:240590901 | 2     | 240590901 | 700         | 1        | 2.77E-07   | 14    | 2           | SNORA26         | Binding Protein |
| DHR5:6372701   | 5     | 6372701   | 2000        | 19       | 7.98E-33   | 33    | 1.65        | AABR07046778.1  | NA              |
| DHR5:167331301 | 5     | 167331301 | 100         | 1        | 7.88E-07   | 17    | 17          | Rere            | Epigenetic      |
| DHR8:181201    | 8     | 181201    | 1100        | 10       | 1.21E-15   | 24    | 2.18        |                 |                 |
| DHR10:75365201 | 10    | 75365201  | 1200        | 2        | 1.85E-08   | 115   | 9.58        | Vezf1           | Transcription   |
| DHR15:56665201 | 15    | 56665201  | 200         | 1        | 1.03E-07   | 7     | 3.5         | Htr2a           | Receptor        |
| DHR19:8431801  | 19    | 8431801   | 300         | 1        | 6.60E-07   | 7     | 2.33        |                 |                 |
| DHR20:1729401  | 20    | 1729401   | 500         | 1        | 4.51E-07   | 3     | 0.6         | Olr1734         | Receptor        |
| DHR20:19484001 | 20    | 19484001  | 1800        | 9        | 4.56E-19   | 22    | 1.22        | Fam13c          | Unknown         |
| DHRMT:1        | MT    | 1         | 16300       | 124      | 1.43E-26   | 303   | 1.85        | Mt-co           | Metabolism      |

**Supplemental Table S5**

**Literature Histone Retention Sites List**

| Author                                                                                                                                                                                                                                                                                                                 | Histones                | Genes                                                                                                                                                                                                                                                 | techniques                                                                   |
|------------------------------------------------------------------------------------------------------------------------------------------------------------------------------------------------------------------------------------------------------------------------------------------------------------------------|-------------------------|-------------------------------------------------------------------------------------------------------------------------------------------------------------------------------------------------------------------------------------------------------|------------------------------------------------------------------------------|
| Hisano M, Erkek S, Dessus-Babus S, Ramos L, Stadler MB, Peters AH. (2013) Genome-wide chromatin analysis in mature mouse and human spermatozoa. Nat Protoc. 8(12):2449-70.                                                                                                                                             | "nucleosome enrichment" | Pold3_1 Pold3_2 Rest_1 Rest_2 Nanog<br>Intergenic Gata6 Sfrs6 Sall4<br>Foxd3                                                                                                                                                                          | qPCR and ChIP                                                                |
|                                                                                                                                                                                                                                                                                                                        | H3K27me3                | Kdm5a Sfrs6 Prmt5 Cdx2 Bmp4 Sox2                                                                                                                                                                                                                      | qPCR and ChIP                                                                |
| Hammoud SS, Nix DA, Zhang H, Purwar J, Carrell DT, Cairns BR. (2009) Distinctive chromatin in human sperm packages genes for embryo development. Nature. 460(7254):473-8.                                                                                                                                              | "nucleosome enrichment" | Sox2 Nanog Oct4                                                                                                                                                                                                                                       | ChIP                                                                         |
| Brykczynska U, Hisano M, Erkek S, Ramos L, Oakeley EJ, Roloff TC, Beisel C, Schübeler D, Stadler MB, Antoine, Peters AHFM (2010) Repressive and active histone methylation mark distinct promoters in human and mouse spermatozoa. Nature Structural & Molecular Biology 17, 679–687.                                  | H3K4me2                 | <b>PROMOTERS</b> TSH2B Pkg2 Actl7a<br>Tnp1 Prm1 Brdt Sfrs6 Jarid1a<br>Rps3 Taf8 Dicer1 Prmt5 Rest<br>Pml Tcl1a Myc Gdf3 Stra8<br>Sall4 Tbx3 Prdm1 Lif gata6<br>Foxd3 Zic3 T Sox2 Bmp4 Cdx2<br>Evx1 Hoxa1 Hoxa4 Hoxa9 Hoxc6<br>Hoxc10 Hoxd8 Nanog Oct4 | ChIP                                                                         |
|                                                                                                                                                                                                                                                                                                                        | H3K27me3                | <b>PROMOTERS</b> TSH2B Pkg2 Actl7a<br>Tnp1 Prm1 Brdt Sfrs6 Jarid1a<br>Rps3 Taf8 Dicer1 Prmt5 Rest<br>Pml Tcl1a Myc Gdf3 Stra8<br>Sall4 Tbx3 Prdm1 Lif gata6<br>Foxd3 Zic3 T Sox2 Bmp4 Cdx2<br>Evx1 Hoxa1 Hoxa4 Hoxa9 Hoxc6<br>Hoxc10 Hoxd8 Nanog Oct4 | ChIP and qPCR                                                                |
| Vieweg M, Dvorakova-Hortova K, Dudkova B, Waliszewski P, Otte M, Oels B, Hajimohammad A, Turley H, Schorsch M, Schuppe HC, Weidner W, Steger K, Paradowska-Dogan A. (2015) Methylation analysis of histone H4K12ac-associated promoters in sperm of healthy donors and subfertile patients. Clin Epigenetics. 19;7:31. | H4K12ac                 | <b>PROMOTERS</b> AFF4, EP300, LRP5,<br>RUVBL1, USP9X, NCOA6, NSD1, and<br>POU2F1                                                                                                                                                                      | pyrosequencing<br>(human sperm healthy<br>donors and subfertile<br>patients) |
